# Supplementary material for: Comparative microRNA Transcriptomes in Domestic Goats Reveal Acclimatization to High Altitude
Source: Front Genet. 2020 Jul 31;11:809. doi: 10.3389/fgene.2020.00809 (PMC7411263; doi:10.3389/fgene.2020.00809)
Supplement: TABLE S6 — Primer sequences for qRT-PCR. [file Table_6.xlsx]

## Sheet: Sheet1
Table S6. Primer sequences for qRT-PCR.
Gene name	Mature sequence	Forward primer sequence	Reverse primer sequence
chi-let-7a-3p	TGAGGTAGTAGGTTGTATAGTT	TGAGGTAGTAGGTTGTATAGTT	Universal primer supplied by a SYBR Premix Ex Taq kit (Takara, Dalian, China)
chi-miR-199c-3p	ACAGTAGTCTGCACATTGGTT	ACAGTAGTCTGCACATTGGTT	Universal primer supplied by a SYBR Premix Ex Taq kit (Takara, Dalian, China)
chi-miR-30d-3p	CAGTCAGATGTTTGCTGC	CAGTCAGATGTTTGCTGC	Universal primer supplied by a SYBR Premix Ex Taq kit (Takara, Dalian, China)
chi-miR-409-5p	AGGTTACCCGAGCAACTTTGCAT	AGGTTACCCGAGCAACTTTGCAT	Universal primer supplied by a SYBR Premix Ex Taq kit (Takara, Dalian, China)
chi-miR-450-3p	ATTGGGAGCATTTTGCATGCAT	ATTGGGAGCATTTTGCATGCAT	Universal primer supplied by a SYBR Premix Ex Taq kit (Takara, Dalian, China)
chi-miR-495-3p	AAACAAACATGGTGCACTTCT	AAACAAACATGGTGCACTTCT	Universal primer supplied by a SYBR Premix Ex Taq kit (Takara, Dalian, China)
conserve-chi-miR-106a-5p	AAAAGTGCTTATAGTGCAGGTAGA	AAAAGTGCTTATAGTGCAGGTAGA	Universal primer supplied by a SYBR Premix Ex Taq kit (Takara, Dalian, China)
conserve-chi-miR-3069-1-3p	ATTGGCACGTCTTGGAATGC	ATTGGCACGTCTTGGAATGC	Universal primer supplied by a SYBR Premix Ex Taq kit (Takara, Dalian, China)
conserve-chi-miR-3099-5p	CAGGCTAGGAGAAATGATTGGA	CAGGCTAGGAGAAATGATTGGA	Universal primer supplied by a SYBR Premix Ex Taq kit (Takara, Dalian, China)
conserve-chi-miR-5011-3p	TATATATACATACACACCATGT	TATATATACATACACACCATGT	Universal primer supplied by a SYBR Premix Ex Taq kit (Takara, Dalian, China)
novel-chi-miR-77-3p	AAAAACCCAGATGAACTTTTTT	AAAAACCCAGATGAACTTTTTT	Universal primer supplied by a SYBR Premix Ex Taq kit (Takara, Dalian, China)
conserve-chi-miR-106a-5p	AAAAGTGCTTACAGTGCAGGTAG	AAAAGTGCTTACAGTGCAGGTAG	Universal primer supplied by a SYBR Premix Ex Taq kit (Takara, Dalian, China)
FLT-1		GGCCAGCGAGTACAAAGCTC	AACAATCACCATCAGAGGCCC
Notch -1		GGACGTCAGACTTGGCTCAG	ACATCTTGGGACGCATCTGG
TSP-1		ATGAAGATGGCCACCAGAAC	GTCATCATCGTGGTCACAGG
VEGF		AGGCCAGCACATAGGAGAGA	TACCGGGATTTCTTGCGCTT
GAPDH		GACAGTCAGCCGCATCTTCT	GCGCCCAATACGACCAAATC
U6		CTCGCTTCGGCAGCACA	AACGCTTCACGAATTTGCGT
